# Supplementary material for: Astridia velutina-like S, N-codoped hierarchical porous carbon from silk cocoon for superior oxygen reduction reaction
Source: Royal Society of Chemistry journal article supplement (doi:10.1039/c6ra06664j), 2016-01-01
Supplement: c6ra06664j1.pdf [file c6ra06664j1.pdf]

*Electronic Supplementary Information for*

**Astridia velutina-like S, N-codoped hierarchical porous carbon from silk cocoon  
for superior oxygen reduction reaction**

Yixuan Wang,<sup>a</sup> Yongpeng Lei<sup>\*a, b, c</sup> and Huaping Wang<sup>a</sup>

<sup>a</sup>Key Laboratory of High Performance Fibers & Products, Ministry of Education,  
Donghua University, Shanghai, P. R. China 201620

<sup>b</sup>College of Basic Education, National University of Defense Technology, Changsha,  
Hunan, P. R. China, 410073

<sup>c</sup>Key Laboratory of Lightweight and Reliability Technology for Engineering Vehicle,  
College of Hunan Province, Changsha, Hunan, P. R. China, 410114

Corresponding author: Tel/fax: +86 731 84575118. E-mail: lypkd@163.com &  
leiyongpeng@nudt.edu.cn (Y. Lei).

## Supplemental Figures and Tables

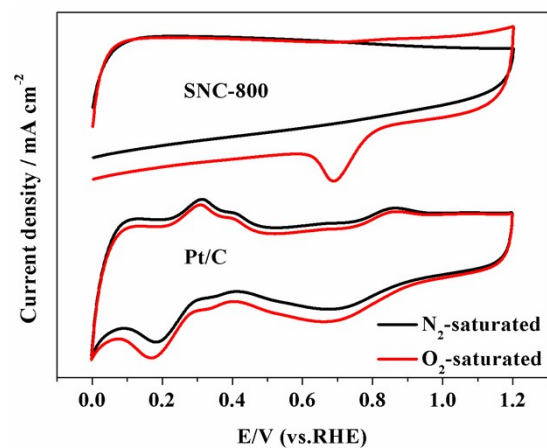

Figure S1. CV curves of SNC-800 and Pt/C electrode in N<sub>2</sub>-saturated (black line) or O<sub>2</sub>-saturated (red line) 0.1 M KOH.

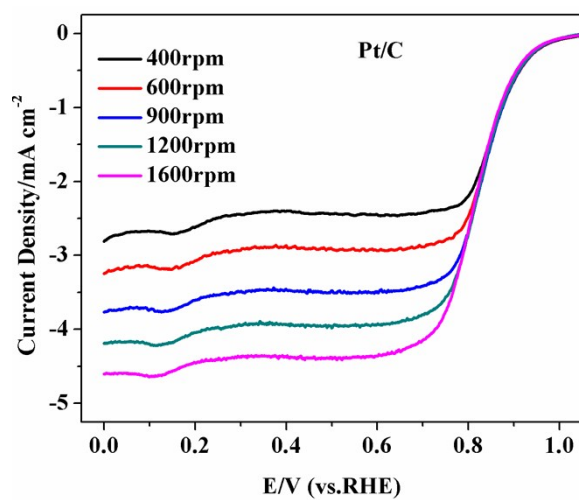

Figure S2. LSV curves of Pt/C electrode at different rotating speed in an O<sub>2</sub>-saturated 0.1 M KOH.

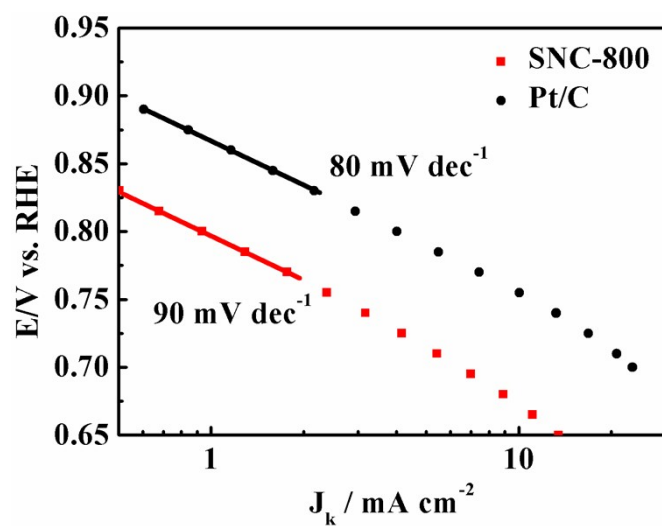

Figure S3 Tafel plots of SNC-800 derived from the corresponding LSV curves

Table S1. Comparison of ORR activity of different non-metal catalysts in 0.1 mol L<sup>-1</sup> KOH electrolyte.

As known, different electrochemical measurement methods have different influences on onset and half-wave potential of electrocatalysts. Therefore, we chose  $\Delta E_{\text{onset}}$  and  $\Delta E_{1/2}$  to determine the electrocatalytic performance. We defined  $\Delta E_{\text{onset}} = E_{\text{onset}}(\text{Pt/C}) - E_{\text{onset}}(\text{Sample})$  and  $\Delta E_{1/2} = E_{1/2}(\text{Pt/C}) - E_{1/2}(\text{Sample})$ .

| Catalyst             | Loading<br>(mg<br>cm <sup>-2</sup> ) | $\Delta E_{\text{onset}}$<br>(mV) | $\Delta E_{1/2}$<br>(mV) | Reference                               |
|----------------------|--------------------------------------|-----------------------------------|--------------------------|-----------------------------------------|
| NG-SCC <sub>f</sub>  | 0.24                                 | 124                               | 101                      | This work                               |
| G-CBP-a              | —                                    | 160                               | 90                       | J. Mater. Chem. A 2014, 2, 7742.        |
| NCNC700/<br>900      | 0.10                                 | 100                               | —                        | Adv. Mater. 2012, 24, 5593.             |
| NGSH                 | 0.25                                 | 80                                | ~60                      | Small 2014, 10, 2251.                   |
| NG-900               | 0.14                                 | 70                                | —                        | Phys. Chem. Chem. Phys. 2012, 14, 3381. |
| CNF@NG               | 0.45                                 | 100                               | ~70                      | Angew. Chem. Int. Ed. 2014, 53, 6905.   |
| PCN-CFP              | ~0.20                                | 50                                | 130                      | Angew. Chem. Int. Ed. 2014, 53, 1.      |
| N-MLG-45             | —                                    | 60                                | ~75                      | Carbon 2014, 76, 1.                     |
| GD <sub>5</sub> -900 | —                                    | ~90                               | ~90                      | Nanoscale 2015, 7, 12598.               |
